# Supplementary material for: USP8 prevents aberrant NF-κB and Nrf2 activation by counteracting ubiquitin signals from endosomes
Source: PubMed Central journal article supplement (PMC10783432; doi:10.1083/jcb.202306013), 2024-01-05

Figure 3D

phospho-TAK1(T184/187)

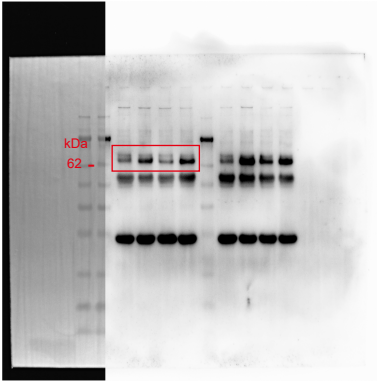

FLAG

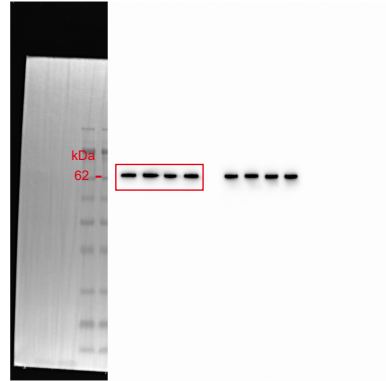

FLAG

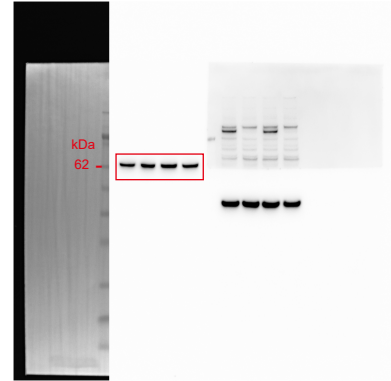

USP8

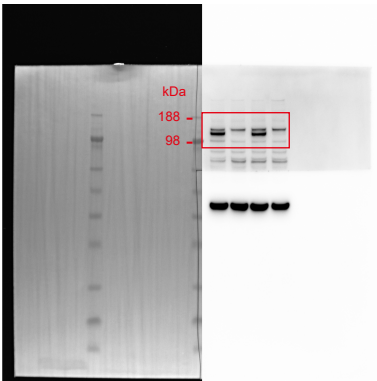

Actin

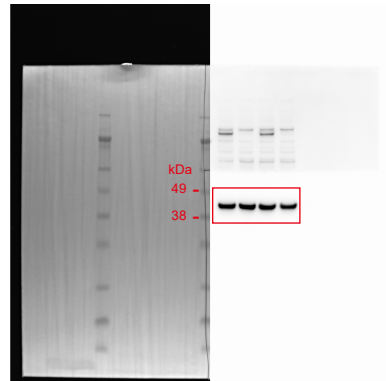

Supplement: JCB_202306013_SourceDataF3.pdf [file JCB_202306013_SourceDataF3.pdf]
