# Supplementary material for: USP8 prevents aberrant NF-κB and Nrf2 activation by counteracting ubiquitin signals from endosomes
Source: PubMed Central journal article supplement (PMC10783432; doi:10.1083/jcb.202306013), 2024-01-05

Figure S2C

CCL5

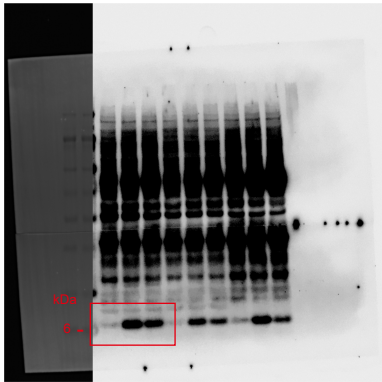

USP8

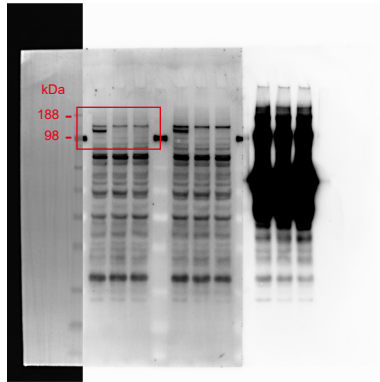

Actin

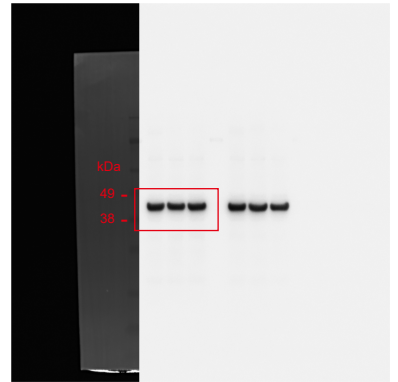

Supplement: JCB_202306013_SourceDataFS2.pdf [file JCB_202306013_SourceDataFS2.pdf]
