# Supplementary material for: USP8 prevents aberrant NF-κB and Nrf2 activation by counteracting ubiquitin signals from endosomes
Source: PubMed Central journal article supplement (PMC10783432; doi:10.1083/jcb.202306013), 2024-01-05

Figure S3C

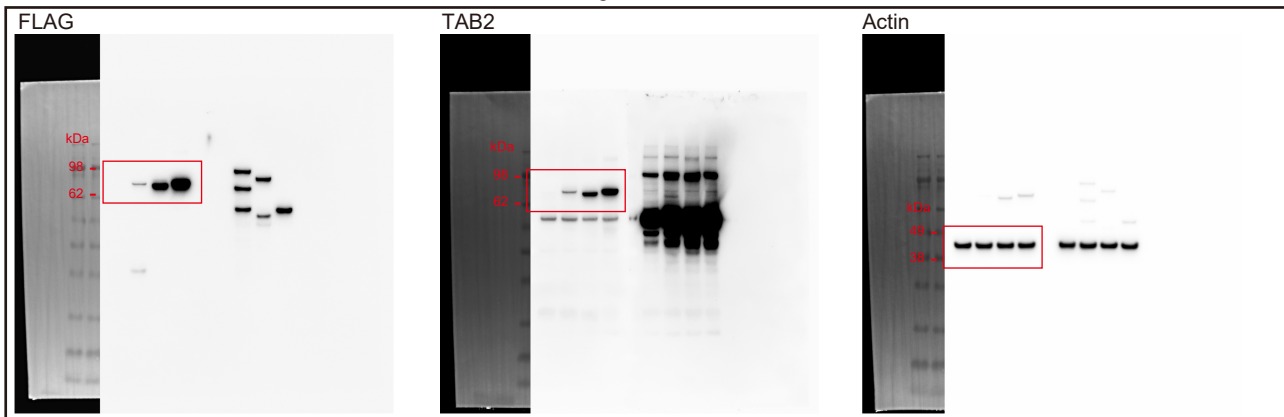

Figure S3G

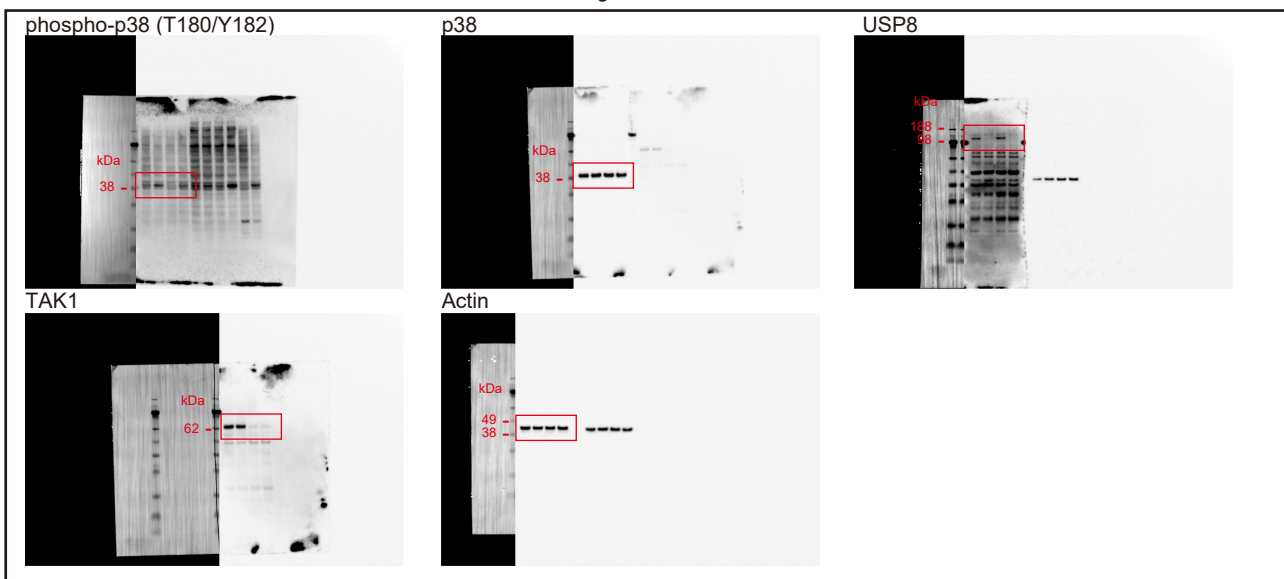

Figure S3H

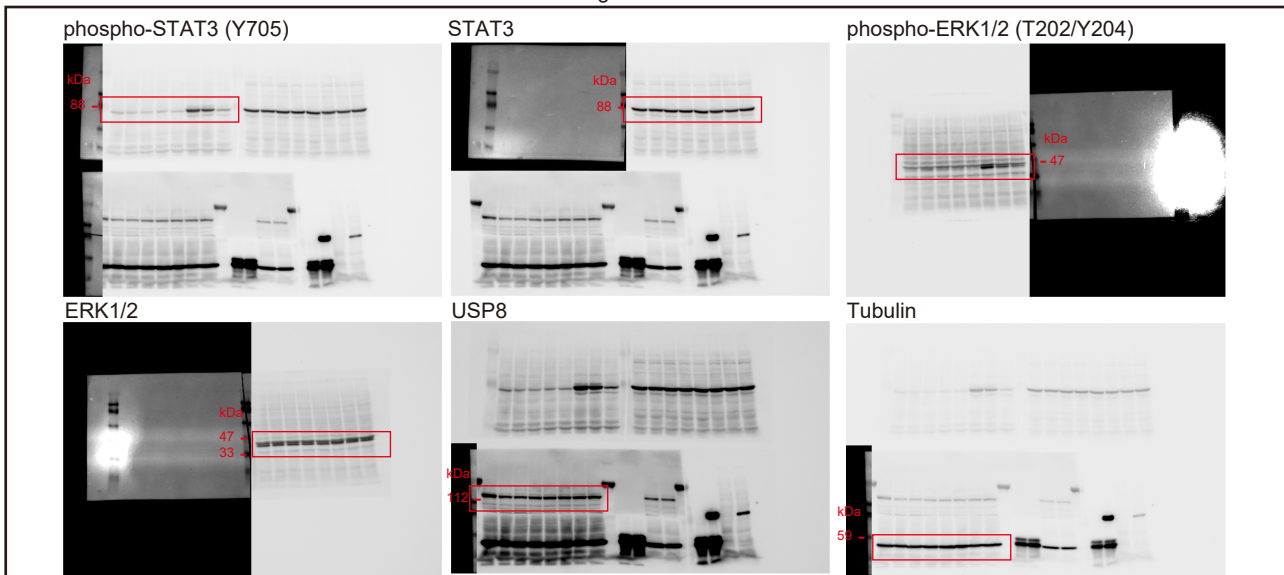

Supplement: JCB_202306013_SourceDataFS3.pdf [file JCB_202306013_SourceDataFS3.pdf]
