# Supplementary material for: USP8 prevents aberrant NF-κB and Nrf2 activation by counteracting ubiquitin signals from endosomes
Source: PubMed Central journal article supplement (PMC10783432; doi:10.1083/jcb.202306013), 2024-01-05

Figure S5A

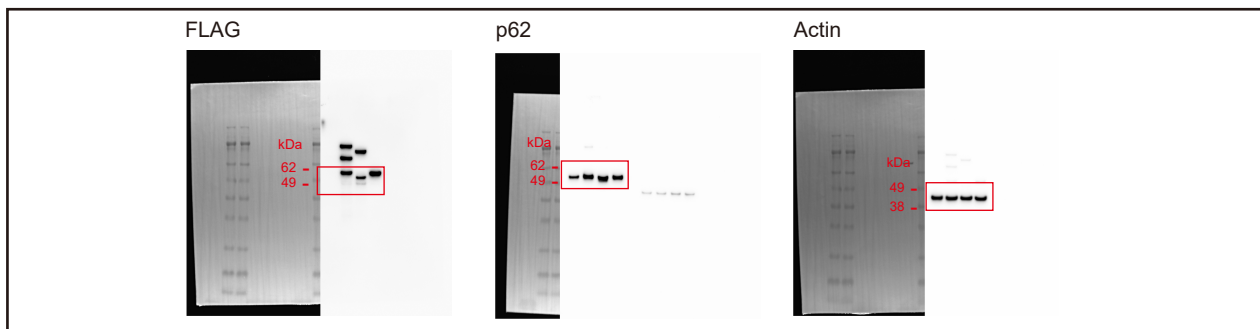

Figure S5C

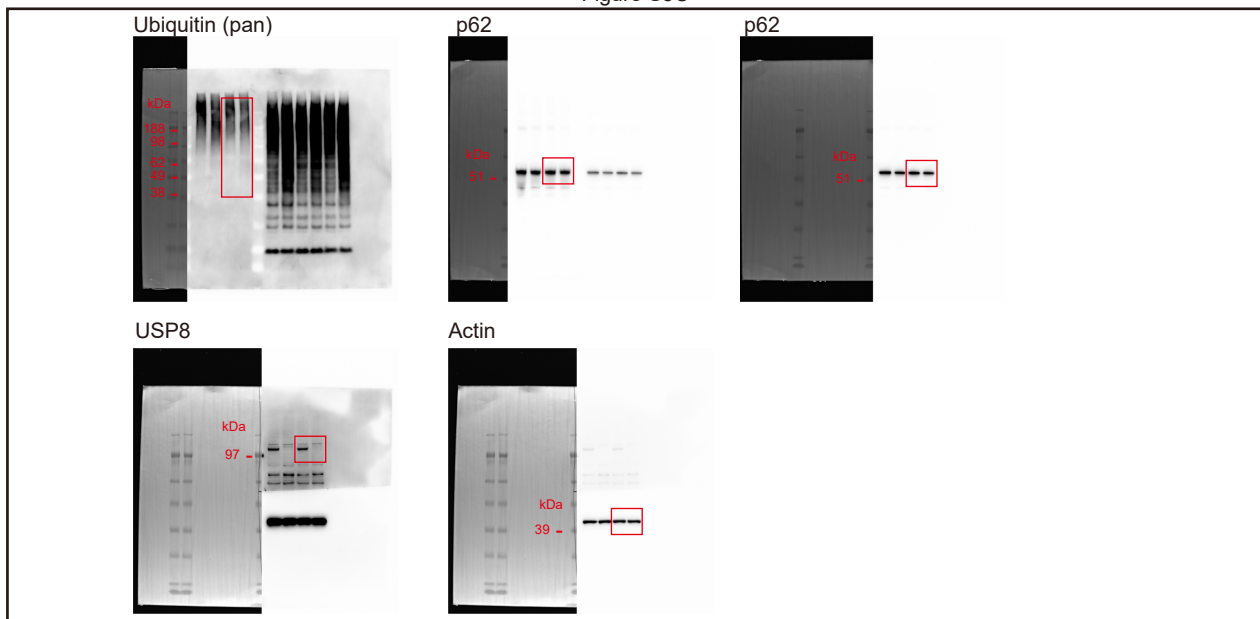

Figure S5D

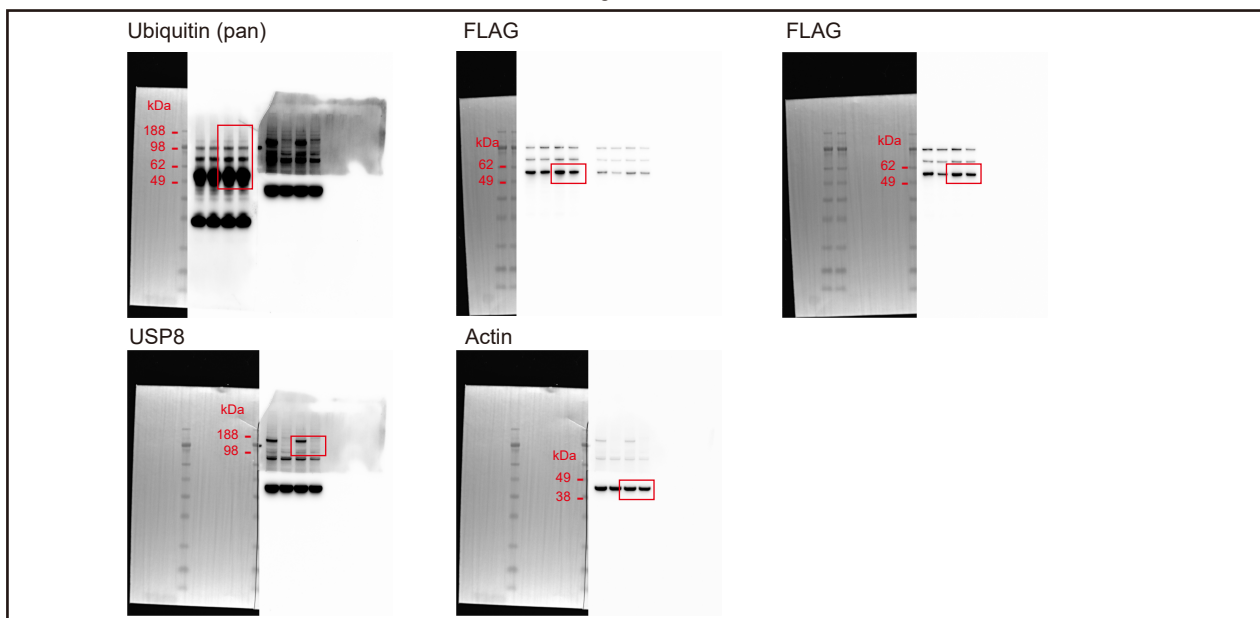

Supplement: JCB_202306013_SourceDataFS5.pdf [file JCB_202306013_SourceDataFS5.pdf]
